# Supplementary material for: Characterization and enhanced carbon dioxide sensing performance of spin-coated Na- and Li-doped and Co-doped cobalt oxide thin films
Source: Royal Society of Chemistry journal article supplement (doi:10.1039/d4ra06847e), 2024-01-01
Supplement: d4ra06847e1.pdf [file d4ra06847e1.pdf]

## Characterization and Enhanced Carbon Dioxide Sensing Performance of Spin-Coated Na- and Li-Doped and co-doped Cobalt Oxide Thin Films

Rana Saad<sup>1\*</sup>, Khaled Abdelkarem<sup>1\*\*</sup>, Adel M. El Sayed<sup>2</sup>, Mohamed Shaban<sup>3\*\*\*</sup>, M. T. Tammam<sup>1</sup>, Hany Hamdy<sup>1</sup>

<sup>1</sup> Nanophotonics and Applications (NPA) Lab, Department of Physics, Faculty of Science, Beni-Suef University, BeniSuef 62514, Egypt; [ranasaad811@gmail.com](mailto:ranasaad811@gmail.com) (R.S.); [oldfighter.khaled123@gmail.com](mailto:oldfighter.khaled123@gmail.com) (K.A.); [mtaha19@yahoo.com](mailto:mtaha19@yahoo.com) (M.T.T); [hshamdy@hotmail.com](mailto:hshamdy@hotmail.com) (H.H.)

<sup>2</sup> Department of Physics, Faculty of Science, Fayoum University, El-Fayoum 63514, Egypt; [ams06@fayoum.edu.eg](mailto:ams06@fayoum.edu.eg) (A.M.)

<sup>3</sup> Department of Physics, Faculty of Science, Islamic University of Madinah, P. O. Box: 170, AlMadinah Almonawara 42351, Saudi Arabia; [mssfadel@aucegypt.edu](mailto:mssfadel@aucegypt.edu) (M.S.)

\*Correspondence1: Rana Saad; [ranasaad811@gmail.com](mailto:ranasaad811@gmail.com) (R.S.)

\*\*Correspondence2: Khaled Abdelkarem; [oldfighter.khaled123@gmail.com](mailto:oldfighter.khaled123@gmail.com) (K.A.)

\*\*\*Correspondence3: Mohamed Shaban; [mssfadel@aucegypt.edu](mailto:mssfadel@aucegypt.edu) (M.S.)

### Supplementary Data

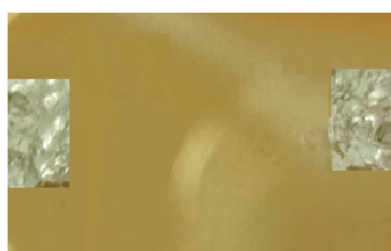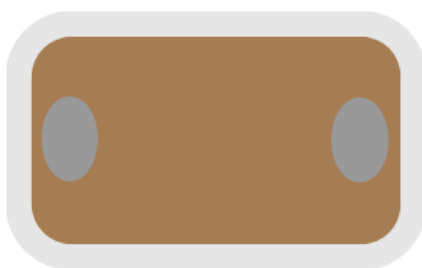

-  Glass Substrate
-  Sensing material
-  Ag Electrode

A physical photograph and a schematic diagram of our sensor
